# Supplementary material for: Spatial Disparities in Access to Healthcare Professionals in Sichuan: Evidence from County-Level Data
Source: MDPI journal article supplement (doi:10.3390/healthcare9081053), 2021-08-16
Supplement: s1 [file s1]

Table S1 Growth of the number of health workforce per 1000 population in China

| region       | HT                              | Growth rate rank | LD                              | Growth rate rank | RN                              | Growth rate rank |
|--------------|---------------------------------|------------------|---------------------------------|------------------|---------------------------------|------------------|
|              | 09annual average growth rate 17 |                  | 09annual average growth rate 17 |                  | 09annual average growth rate 17 |                  |
| Beijing      | 12.92-1.66%11.30                | 30               | 5.04-1.97%4.30                  | 30               | 4.95-0.38%4.80                  | 30               |
| Tianjin      | 6.90-0.74%6.50                  | 29               | 2.80-0.92%2.60                  | 29               | 2.34-0.83%2.50                  | 29               |
| Hebei        | 3.71-5.51%5.70                  | 18               | 1.72-5.30%2.60                  | 9                | 1.04-9.18%2.10                  | 13               |
| Shanxi       | 5.38-1.99%6.30                  | 28               | 2.45-0.25%2.50                  | 27               | 1.65-3.85%2.60                  | 25               |
| Neimenggu    | 5.50-3.24%7.10                  | 24               | 2.82-0.09%2.80                  | 28               | 1.44-8.67%2.80                  | 17               |
| Liaoning     | 5.32-2.92%6.70                  | 26               | 2.25-1.82%2.60                  | 25               | 1.99-4.82%2.90                  | 28               |
| Jilin        | 4.87-3.06%6.20                  | 25               | 2.21-2.05%2.60                  | 24               | 1.56-6.07%2.50                  | 24               |
| Heilongjiang | 4.56-3.70%6.10                  | 22               | 1.93-2.22%2.30                  | 22               | 1.45-6.50%2.40                  | 23               |
| Shanghai     | 9.48-2.57%7.70                  | 31               | 3.79-3.71%2.80                  | 31               | 3.73-0.79%3.50                  | 31               |
| Jiangsu      | 4.16-6.34%6.80                  | 11               | 1.69-6.03%2.70                  | 6                | 1.50-9.05%3.00                  | 14               |
| Zhejiang     | 5.65-4.61%8.10                  | 20               | 2.41-3.61%3.20                  | 20               | 1.87-7.36%3.30                  | 22               |
| Anhui        | 3.07-6.29%5.00                  | 13               | 1.25-5.37%1.90                  | 8                | 1.03-9.95%2.20                  | 10               |
| Fujian       | 3.74-5.86%5.90                  | 15               | 1.57-3.70%2.10                  | 19               | 1.37-8.34%2.60                  | 19               |
| Jiangxi      | 3.25-5.79%5.10                  | 17               | 1.28-4.35%1.80                  | 15               | 1.16-8.93%2.30                  | 15               |
| Shandong     | 4.39-5.82%6.90                  | 16               | 1.86-4.28%2.60                  | 16               | 1.48-8.77%2.90                  | 16               |
| Henan        | 3.38-7.66%6.10                  | 7                | 1.42-0.21%2.30                  | 4                | 1.05-11.45%2.50                 | 5                |
| Hubei        | 4.02-6.79%6.80                  | 8                | 1.59-5.82%2.50                  | 7                | 1.42-10.25%3.10                 | 9                |
| Hunan        | 3.62-6.74%6.10                  | 9                | 1.51-6.51%2.50                  | 2                | 1.19-9.72%2.50                  | 11               |
| Guangdong    | 5.04-2.83%6.30                  | 27               | 1.93-2.22%2.30                  | 22               | 1.83-3.46%2.80                  | 26               |
| Guangxi      | 3.32-8.12%6.20                  | 5                | 1.28-6.28%2.10                  | 3                | 1.21-10.55%2.70                 | 8                |
| Hainan       | 4.30-5.30%6.50                  | 19               | 1.60-4.06%2.20                  | 18               | 1.73-7.56%3.10                  | 21               |
| Chongqing    | 3.05-9.27%6.20                  | 2                | 1.36-6.20%2.20                  | 5                | 0.97-14.17%2.80                 | 2                |
| Sichuan      | 3.37-8.35%6.40                  | 4                | 1.54-5.14%2.30                  | 11               | 1.01-13.59%2.80                 | 3                |
| Guizhou      | 2.37-13.00%6.30                 | 1                | 1.01-9.58%2.10                  | 1                | 0.78-16.79%2.70                 | 1                |
| Yunnan       | 3.02-8.73%5.90                  | 3                | 1.35-5.04%2.00                  | 12               | 1.04-12.67%2.70                 | 4                |
| Xizang       | 3.49-4.33%4.90                  | 21               | 1.57-4.89%2.30                  | 13               | 0.69-8.24%1.30                  | 20               |
| Shaanxi      | 4.46-7.74%8.10                  | 6                | 1.81-3.59%2.40                  | 21               | 1.42-11.12%3.30                 | 6                |
| Gansu        | 3.38-6.51%5.60                  | 10               | 1.39-5.29%2.10                  | 10               | 0.98-10.64%2.20                 | 7                |
| Qinghai      | 4.43-5.89%7.00                  | 14               | 1.88-4.14%2.60                  | 17               | 1.44-8.67%2.80                  | 17               |
| Ningxia      | 4.48-6.29%7.30                  | 12               | 1.91-4.42%2.70                  | 14               | 1.55-9.48%3.20                  | 12               |
| Xinjiang     | 5.47-3.31%7.10                  | 23               | 2.20-1.61%2.50                  | 26               | 1.92-5.29%2.90                  | 27               |
| SUM          | 4.15-5.77%6.50                  | -                | 1.75-4.03%2.40                  | -                | 1.39-8.65%2.70                  | -                |

Unit: Persons
