# Supplementary material for: Spatial Disparities in Access to Healthcare Professionals in Sichuan: Evidence from County-Level Data
Source: MDPI journal article supplement (doi:10.3390/healthcare9081053), 2021-08-16
Supplement: s1 [file s1]

Table S5 The p-value results for chi-square linear by linear association test

| Region        | Health technicians |       | Licensed doctor |       | Registered nurses |       | Pharmacist |       | Technologist |       | Interns |       |
|---------------|--------------------|-------|-----------------|-------|-------------------|-------|------------|-------|--------------|-------|---------|-------|
|               | 09-13              | 13-17 | 09-13           | 13-17 | 09-13             | 13-17 | 09-13      | 13-17 | 09-13        | 13-17 | 09-13   | 13-17 |
| Chengdu       | 0.046              | 0.047 | 0.046           | 0.048 | 0.046             | 0.046 | 0.047      | 0.047 | 0.046        | 0.047 | 0.071   | 0.288 |
| Zigong        | 0.050              | 0.046 | 0.050           | 0.112 | 0.050             | 0.046 | 0.056      | 0.050 | 0.051        | 0.047 | 0.064   | 0.074 |
| Panzhihua     | 0.053              | 0.059 | 0.071           | 0.279 | 0.050             | 0.058 | 0.142      | 0.051 | 0.066        | 0.074 | 0.193   | 0.391 |
| Luzhou        | 0.049              | 0.051 | 0.047           | 0.055 | 0.048             | 0.047 | 0.046      | 0.079 | 0.053        | 0.202 | 0.147   | 0.107 |
| Deyang        | 0.047              | 0.046 | 0.048           | 0.060 | 0.046             | 0.046 | 0.052      | 0.060 | 0.046        | 0.047 | 0.061   | 0.221 |
| Mianyang      | 0.048              | 0.048 | 0.052           | 0.077 | 0.046             | 0.046 | 0.097      | 0.462 | 0.056        | 0.071 | 0.076   | 0.060 |
| Guangyuan     | 0.050              | 0.047 | 0.138           | 0.860 | 0.049             | 0.046 | 0.049      | 0.442 | 0.049        | 0.050 | 0.066   | 0.101 |
| Suining       | 0.047              | 0.050 | 0.047           | 0.116 | 0.047             | 0.048 | 0.050      | 0.058 | 0.049        | 0.060 | 0.605   | 0.065 |
| Neijiang      | 0.059              | 0.059 | 0.072           | 0.081 | 0.047             | 0.048 | 0.226      | 0.047 | 0.074        | 0.469 | 0.194   | 0.075 |
| Leshan        | 0.047              | 0.049 | 0.056           | 0.166 | 0.046             | 0.046 | 0.077      | 0.223 | 0.050        | 0.050 | 0.934   | 0.776 |
| Nanchong      | 0.046              | 0.046 | 0.053           | 0.046 | 0.052             | 0.059 | 0.053      | 0.049 | 0.063        | 0.046 | 0.050   | 0.111 |
| Meishan       | 0.055              | 0.059 | 0.075           | 0.373 | 0.052             | 0.049 | 0.063      | 0.106 | 0.080        | 0.061 | 0.074   | 0.482 |
| Yibin         | 0.052              | 0.051 | 0.072           | 0.106 | 0.048             | 0.047 | 0.080      | 0.048 | 0.061        | 0.047 | 0.054   | 0.115 |
| Guangan       | 0.049              | 0.046 | 0.048           | 0.046 | 0.050             | 0.046 | 0.060      | 0.050 | 0.070        | 0.057 | 0.055   | 0.079 |
| Dazhou        | 0.050              | 0.068 | 0.053           | 0.424 | 0.050             | 0.053 | 0.090      | 0.162 | 0.053        | 0.066 | 0.119   | 0.059 |
| Yaan          | 0.062              | 0.047 | 0.058           | 0.066 | 0.052             | 0.047 | 0.122      | 0.111 | 0.068        | 0.050 | 0.708   | 0.071 |
| Bazhong       | 0.050              | 0.053 | 0.046           | 0.731 | 0.052             | 0.046 | 0.056      | 0.050 | 0.123        | 0.058 | 0.790   | 0.107 |
| Ziyang        | 0.046              | 0.149 | 0.046           | 0.091 | 0.047             | 0.875 | 0.058      | 0.232 | 0.047        | 0.334 | 0.054   | 0.070 |
| Abazhou       | 0.071              | 0.047 | 0.418           | 0.054 | 0.053             | 0.046 | 0.068      | 0.065 | 0.075        | 0.049 | 0.173   | 0.055 |
| Ganzizhou     | 0.078              | 0.046 | 0.828           | 0.336 | 0.054             | 0.046 | 0.067      | 0.343 | 0.064        | 0.059 | 0.242   | 0.056 |
| Liangshanzhou | 0.054              | 0.046 | 0.082           | 0.081 | 0.082             | 0.046 | 0.072      | 0.049 | 0.078        | 0.046 | 0.056   | 0.059 |
| SUM           | 0.047              | 0.046 | 0.046           | 0.051 | 0.046             | 0.046 | 0.047      | 0.046 | 0.049        | 0.048 | 0.069   | 0.080 |
